# Supplementary material
Source: Springer Nature journal article supplement (https://www.springermedizin.de/resource/supplementary/12985_2009_553_MOESM3_ESM.pdf/9608436)

Relative Mean Fluorescence Intensity

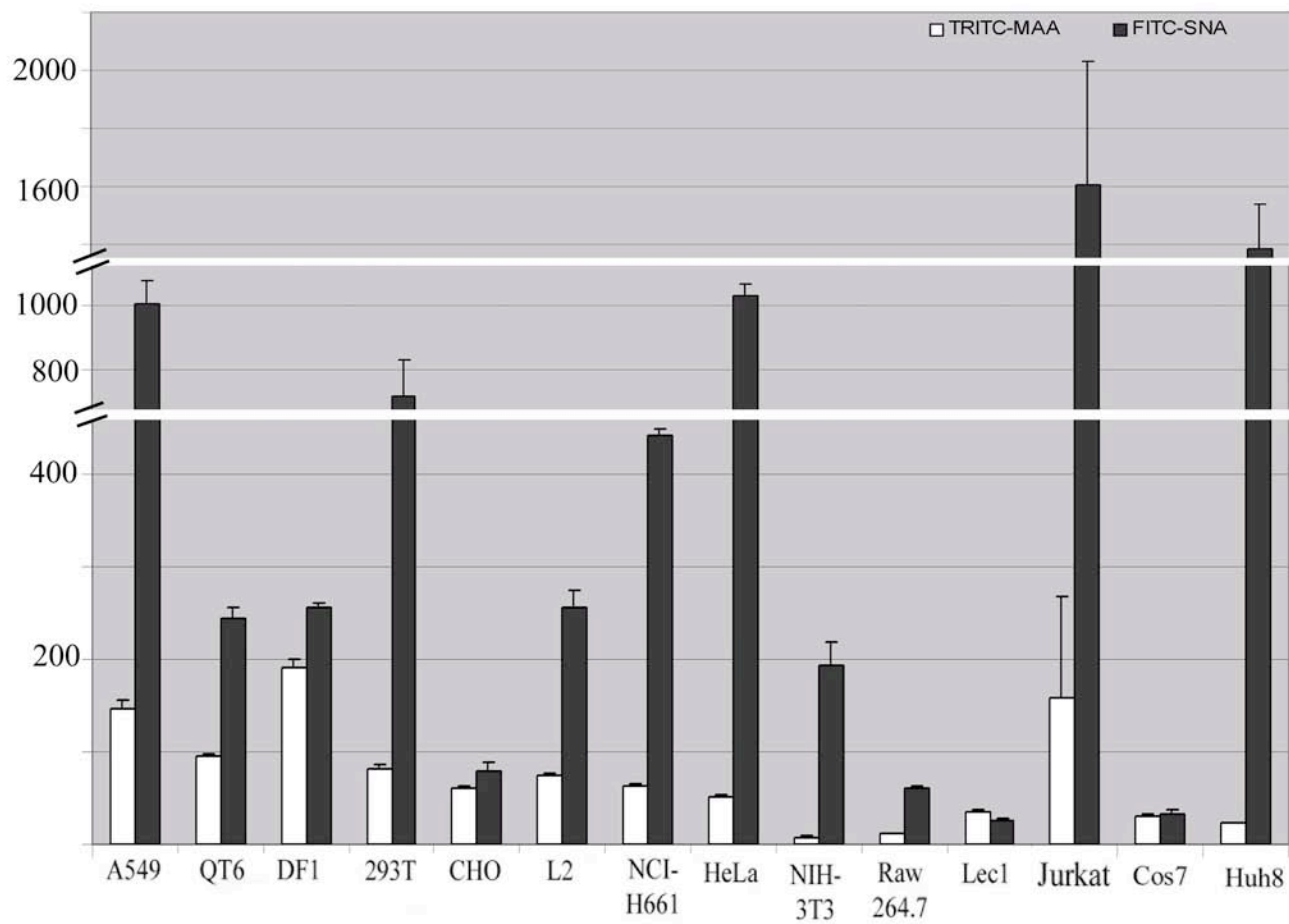

Supplement: MOESM3 [file 9608436]
